# Supplementary material for: Increases in Variation of Barbell Kinematics Are Observed with Increasing Intensity in a Graded Back Squat Test
Source: MDPI journal article supplement (doi:10.3390/sports5030051), 2017-07-14
Supplement: s1 [file s1]

## Supplementary Materials: Increases in Variation of Barbell Kinematics Are Observed with Increasing Intensity in a Graded Back Squat Test

Kevin M. Carroll <sup>1,\*</sup>, Kimitake Sato <sup>1</sup>, Caleb D. Bazylar <sup>1</sup>, N. Travis Triplett <sup>2</sup> and Michael H. Stone <sup>1</sup>

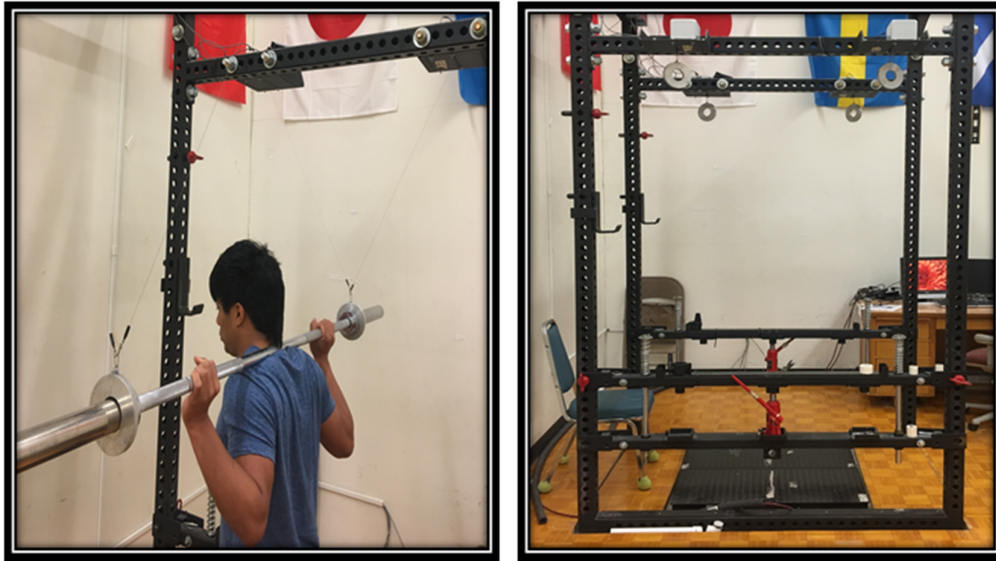

**Figure S1.** Set-up configuration of linear position transducers for data collection.

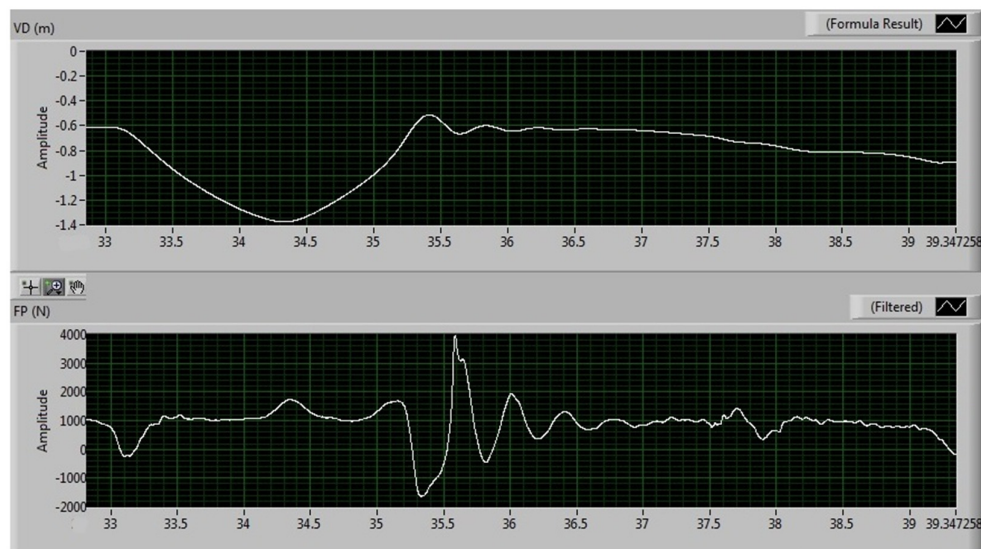

**Figure S2.** LabView collection of vertical displacement-time and vertical force-time data.
